# Supplementary material for: Anti-4-1BB antibody-based combination therapy augments antitumor immunity by enhancing CD11c+CD8+ T cells in renal cell carcinoma
Source: PubMed Central journal article supplement — Oncol Lett. 2021 Dec 6;23(2):43. doi: 10.3892/ol.2021.13161 (PMC8674882; doi:10.3892/ol.2021.13161), 2021-12-06

Figure S1. Representative FACS plots of data presented in Fig. 2. ISTF and anti-4-1BB mAb co-treatment induces marked expansion of CD11c<sup>+</sup>CD8<sup>+</sup> T cells in splenocytes of tumor-bearing mice. Renca tumors were established and four groups of mice were treated with ISTF and/or anti-4-1BB mAb as described in Fig. 1. On day 14, splenocytes were excised; double stained with PE-, Cy- and FITC-conjugated antibodies and analyzed by FACS. Representative flow plots showing the percentages of (A) CD3<sup>+</sup>CD8<sup>+</sup> T cells, (B) CD11c<sup>+</sup>CD8<sup>+</sup> T cells, (C) CD4<sup>+</sup>Foxp3<sup>+</sup> Treg cells, (D) CD11b<sup>+</sup>F480<sup>+</sup> macrophages, (E) CD3<sup>+</sup>CD4<sup>+</sup> T cells, (F) CD3<sup>+</sup>DX5<sup>+</sup> natural killer cells, (G) CD11b<sup>+</sup>Gr1<sup>+</sup> myeloid cells, CD11b<sup>+</sup>Gr1<sup>+</sup>int (myeloid-derived suppressor cells), CD11b<sup>+</sup>Gr1<sup>+</sup>hi (neutrophils) and (H) B220<sup>+</sup> B cells. ISTF, immunostimulatory factor; mAb, monoclonal antibody; FACS, fluorescence activated cell sorting.

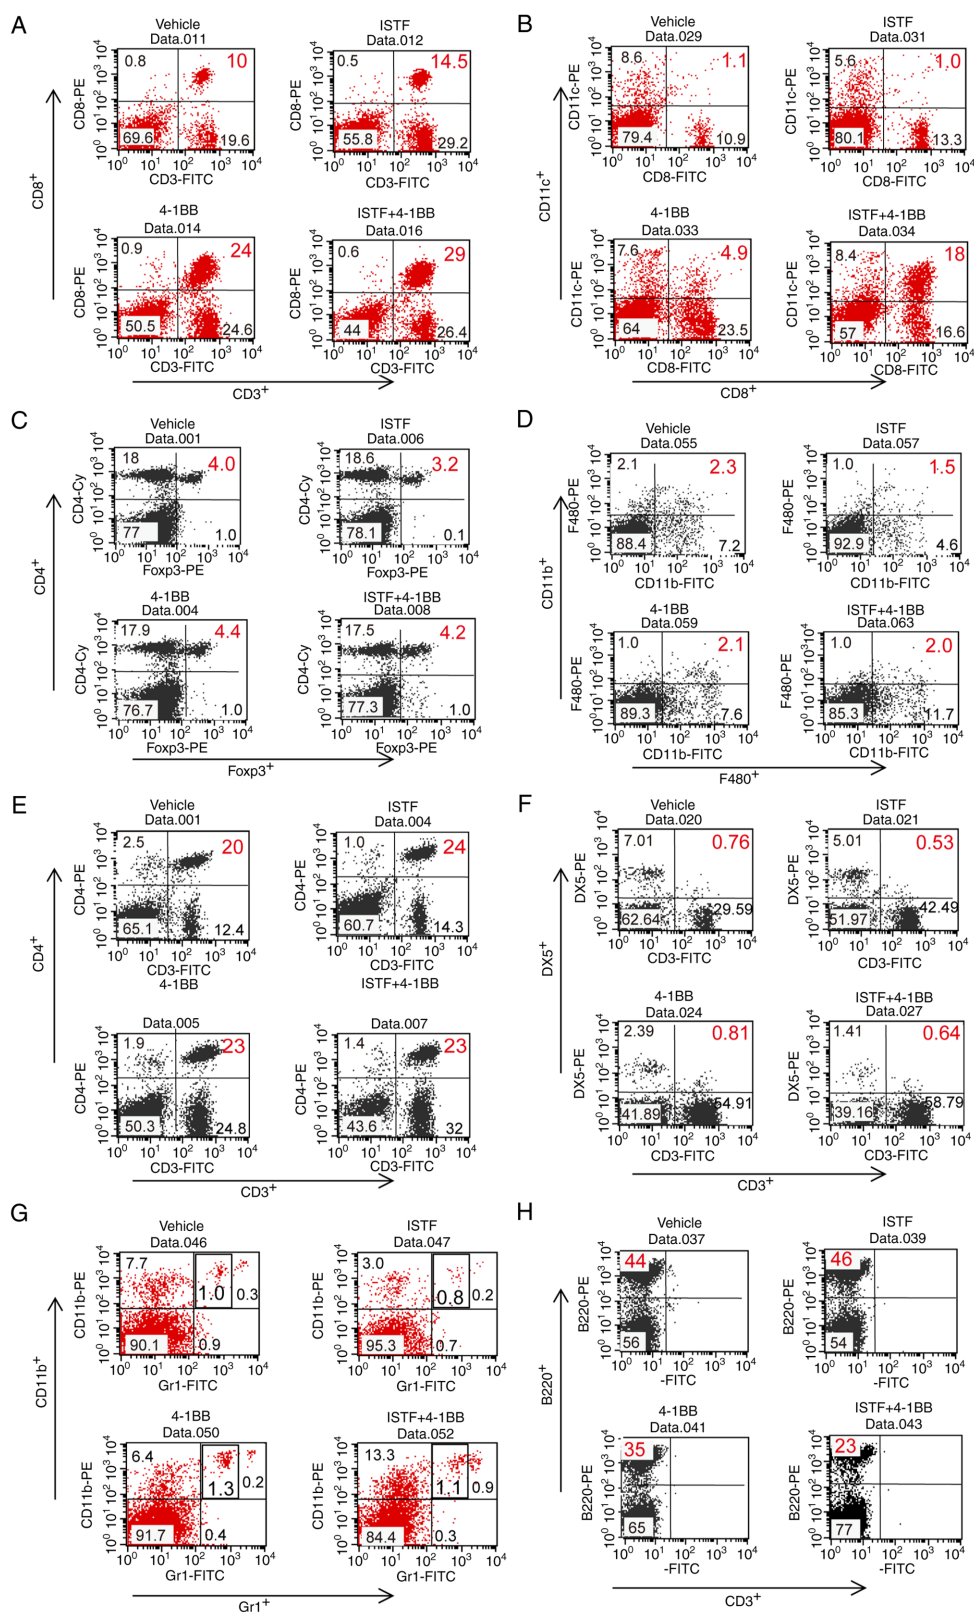

Figure S2. Representative FACS plots of data presented in Fig. 4. Combined therapy with ISTF and anti-4-1BB mAb induces marked expansion of CD11c<sup>+</sup>CD8<sup>+</sup> T cells in TILs. Renca tumors were established and four groups of mice were treated with ISTF and/or anti-4-1BB mAb as described in Fig. 1. On day 14, the mice were sacrificed and tumors were harvested. Tumor-infiltrating lymphocytes were stained with PE-, Cy- and FITC-conjugated antibodies and analyzed by FACS. Representative flow plots showing the percentages of CD3<sup>+</sup>CD4<sup>+</sup> T cells among TILs. ISTF, immunostimulatory factor; mAb, monoclonal antibody; FACS, fluorescence activated cell sorting; TILs, tumor-infiltrating lymphocytes.

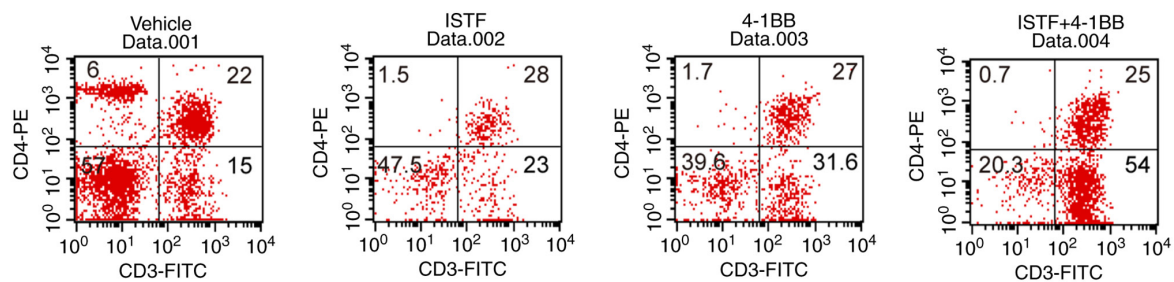

Supplement: Supplementary_Data.pdf [file Supplementary_Data.pdf]
